# Supplementary material
Source: PubMed Central journal article supplement (PMC1762033)
Supplement: NIHMS14497-supplement-S1.pdf [file NIHMS14497-supplement-S1.pdf]

Supplemental Figure S1

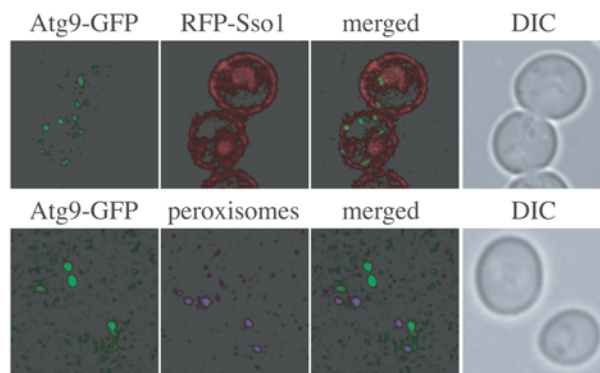

**Fig. S1. Part of Atg9 localizes to mitochondria.** Atg9 does not localize to the plasma membrane or peroxisomes. The Atg9-GFP (FRY162) strain transformed with either the pRFPSSO1(416) or pBFPSKL(415) plasmid was grown to O.D.<sub>600</sub> = 0.8 in YPD. DIC, differential interference contrast.
